# Supplementary material for: Fractal-structured multifocal intraocular lens
Source: PLoS One. 2018 Jul 9;13(7):e0200197. doi: 10.1371/journal.pone.0200197 (PMC6037343; doi:10.1371/journal.pone.0200197)
Supplement: S1 Dataset — (XLSX) [file pone.0200197.s001.xlsx]

## Sheet: Datos
Pupil Diameter (mm)	2.5	2.5	2.5	2.5	3	3	3	3	4.5	4.5	4.5	4.5
Wavelength (nm)	490	555	630	555	490	555	630	555	490	555	630	555
Power (D)	6FI	6FI	6FI	Monofocal	6FI	6FI	6FI	Monofocal	6FI	6FI	6FI	Monofocal
17	0.00170915	0.0128925	0.00105339	0.00619905	0.000242636	0.00464716	0.00184084	0.000133415	0.000355781	0.000438309	9.52275e-05	0.000542219
17.03	0.00101709	0.0129964	0.0017708	0.00636251	9.48112e-05	0.00374363	0.00177665	1.39217e-06	0.000175793	0.000330847	0.000359131	0.000336152
17.06	0.000510631	0.0127668	0.0026417	0.00630438	0.000166767	0.00281302	0.00165537	9.07613e-05	0.000304266	0.000285416	0.000707748	9.72191e-05
17.09	0.000280489	0.0122086	0.00362969	0.00602256	0.00052266	0.00193293	0.00149261	0.000407507	0.000827852	0.000302588	0.00101239	4.56994e-07
17.12	0.000404223	0.011346	0.00469109	0.00553105	0.0011964	0.00117261	0.00130649	0.000924634	0.00153717	0.000367257	0.00115753	0.000129751
17.15	0.00093835	0.0102227	0.00577686	0.00485987	0.00218209	0.000585649	0.00111549	0.00158424	0.00203643	0.000436893	0.00109095	0.000412682
17.18	0.00191166	0.00889967	0.0068351	0.00405393	0.0034296	0.000204493	0.00093642	0.00230422	0.0020108	0.000454216	0.000844577	0.000663052
17.21	0.00332032	0.00745246	0.00781361	0.00317073	0.00484659	3.75235e-05	0.000782728	0.00298895	0.00146197	0.000382819	0.000516699	0.000707082
17.24	0.00512545	0.00596716	0.00866279	0.00227707	0.00630715	6.9032e-05	0.000663236	0.00354253	0.000734012	0.000241787	0.000224878	0.000508296
17.27	0.00725339	0.00453539	0.00933854	0.00144493	0.00766622	0.000262081	0.000581555	0.00388291	0.000300526	0.000109286	5.31627e-05	0.000201952
17.3	0.00959897	0.00324871	0.00980497	0.000746714	0.0087781	0.000563872	0.000536123	0.00395483	0.000458284	8.30545e-05	1.9248e-05	8.9598e-06
17.33	0.0120317	0.00219279	0.010037	0.000250177	0.0095162	0.000912928	0.000520869	0.00373963	0.00114052	0.000216849	7.63975e-05	8.33177e-05
17.36	0.0144044	0.00144151	0.0100224	1.34027e-05	0.00979129	0.00124718	0.000526381	0.00326031	0.00197321	0.000474045	0.000146823	0.000397788
17.39	0.0165644	0.00105158	0.00976345	8.00952e-05	0.00956515	0.00151187	0.000541428	0.00258086	0.00252171	0.000734392	0.000167269	0.000751842
17.42	0.0183648	0.00105806	0.00927786	0.000475607	0.00885745	0.0016664	0.000554606	0.00179944	0.00254767	0.000857555	0.000122084	0.000903968
17.45	0.0196777	0.00147091	0.00859896	0.00120398	0.00774433	0.00168904	0.000555932	0.00103628	0.0021077	0.000767764	4.6812e-05	0.000741893
17.48	0.0204051	0.00227321	0.00777513	0.0022463	0.00634876	0.00157913	0.000538164	0.000417383	0.00145651	0.000505138	1.93169e-06	0.000371559
17.51	0.0204895	0.00342093	0.00686846	0.0035605	0.00482379	0.00135641	0.000497715	5.64801e-05	0.000856935	0.000206661	3.28332e-05	5.59297e-05
17.54	0.0199209	0.00484461	0.00595249	0.00508281	0.00333115	0.00105769	0.000435071	3.74407e-05	0.000442837	2.44781e-05	0.000139507	3.72808e-05
17.57	0.0187403	0.00645284	0.00510934	0.00673077	0.00201846	0.000731187	0.000354694	0.000399931	0.000209619	3.21996e-05	0.00027368	0.000362144
17.6	0.0170401	0.00813753	0.00442614	0.00840777	0.000998538	0.000429525	0.000264487	0.00113053	9.43587e-05	0.000180999	0.000365471	0.000834282
17.63	0.0149589	0.00978057	0.00399096	0.0100089	0.000334275	0.000202192	0.000174939	0.00216098	5.12451e-05	0.000336455	0.000364628	0.00113828
17.66	0.0126736	0.0112618	0.00388841	0.0114278	3.1439e-05	8.85211e-05	9.81243e-05	0.00337436	6.28796e-05	0.000373022	0.000272553	0.00105736
17.69	0.010386	0.0124674	0.0041951	0.0125638	4.07931e-05	0.000112129	4.67775e-05	0.00461878	0.000106472	0.000262115	0.000145714	0.000636276
17.72	0.00830816	0.0132991	0.00497511	0.01333	0.000269257	0.000277519	3.36083e-05	0.0057272	0.000136029	9.16508e-05	6.66136e-05	0.000168592
17.75	0.0066445	0.0136823	0.00627584	0.0136598	0.00059839	0.000569283	7.10255e-05	0.00654095	0.000111819	8.33681e-07	9.68803e-05	4.52101e-06
17.78	0.00557432	0.0135738	0.00812425	0.0135137	0.000907217	0.000953977	0.000171347	0.00693375	4.52148e-05	7.42021e-05	0.000238158	0.000303543
17.81	0.00523466	0.0129681	0.010524	0.0128837	0.0010956	0.00138438	0.00034749	0.00683286	7.98313e-07	0.000271411	0.000423956	0.000904963
17.84	0.00570583	0.011901	0.0134531	0.011797	0.00110417	0.00180559	0.000614044	0.00623409	3.88054e-05	0.000448536	0.000550231	0.00141835
17.87	0.00700064	0.0104517	0.0168633	0.0103164	0.000927337	0.00216209	0.000988526	0.00520792	0.000148367	0.000463567	0.000532166	0.00148629
17.9	0.00905875	0.00874207	0.0206799	0.00853921	0.000616902	0.00240504	0.00149255	0.00389535	0.000243182	0.000295184	0.000359894	0.00104458
17.93	0.0117467	0.00693241	0.0248034	0.00659339	0.000275295	0.00249873	0.00215258	0.00249302	0.000236383	8.57719e-05	0.000124762	0.000392936
17.96	0.0148647	0.00521527	0.029112	0.00463118	3.92589e-05	0.00242568	0.00299997	0.00122913	0.000129	6.46941e-05	7.23973e-07	9.675e-06
17.99	0.0181587	0.00380618	0.0334658	0.00282077	5.62891e-05	0.00218979	0.00406999	0.000332678	2.10767e-05	0.000390347	0.000186211	0.000222076
18.02	0.0213397	0.00293232	0.0377114	0.00133616	0.000457502	0.00181747	0.0053996	1.00845e-29	2.27636e-05	0.00101454	0.000829639	0.000957024
18.05	0.0241063	0.00281944	0.0416885	0.000345734	0.00133128	0.00135674	0.00702403	0.00036319	0.00014761	0.00167206	0.00196822	0.00175827
18.08	0.0261714	0.00367773	0.0452362	2.73006e-07	0.00270207	0.000874803	0.00897212	0.00146504	0.000306086	0.0020244	0.0035025	0.00208155
18.11	0.0272895	0.00568743	0.0482005	0.000421109	0.00451809	0.000454501	0.0112608	0.00324468	0.000431062	0.00188255	0.00521308	0.00168026
18.14	0.0272835	0.00898504	0.0504417	0.00168922	0.00665023	0.000190333	0.0138892	0.00553703	0.000623381	0.0013674	0.00681012	0.000812197
18.17	0.0260688	0.0136509	0.0518421	0.00383604	0.00890311	0.000184438	0.0168326	0.00808718	0.00114431	0.000887497	0.00799829	0.000101753
18.2	0.0236712	0.0196991	0.0523127	0.00683675	0.011037	0.000542932	0.0200381	0.0105793	0.00219014	0.000918887	0.00854148	0.000123644
18.23	0.0202386	0.0270704	0.0517993	0.0106066	0.0127982	0.00137263	0.0234207	0.0126769	0.00359813	0.00170019	0.00831851	0.000981343
18.26	0.0160438	0.0356287	0.0502881	0.0150012	0.0139535	0.002778	0.0268627	0.0140708	0.00476438	0.00302732	0.00736602	0.0021838
18.29	0.0114773	0.0451621	0.0478089	0.0198201	0.0143246	0.0048578	0.0302162	0.014527	0.00494832	0.00429487	0.00590254	0.00293997
18.32	0.00703085	0.0553873	0.0444376	0.0248152	0.0138181	0.00770104	0.0333079	0.0139297	0.00382925	0.00479849	0.00432051	0.00270205
18.35	0.00327124	0.0659597	0.0402966	0.0297027	0.0124464	0.0113814	0.0359483	0.0123113	0.00190335	0.00415803	0.00312867	0.00159134
18.38	0.000805821	0.0764869	0.0355527	0.0341785	0.0103383	0.0159501	0.0379442	0.00986508	0.000328411	0.0026354	0.00283509	0.0003859
18.41	0.000241769	0.0865456	0.0304144	0.0379374	0.00773735	0.0214265	0.0391134	0.00693559	0.000196251	0.00115765	0.00378461	2.98949e-05
18.44	0.00214139	0.0957026	0.0251254	0.0406933	0.00498865	0.0277874	0.0393017	0.00398725	0.00169588	0.000998261	0.00599636	0.000964878
18.47	0.00697658	0.103537	0.0199582	0.0422017	0.00251616	0.0349557	0.0384001	0.00155173	0.003832	0.00324112	0.00907033	0.00274659
18.5	0.0150855	0.109662	0.0152048	0.0422813	0.000793136	0.0427896	0.0363623	0.000160008	0.00505256	0.00826149	0.0122289	0.00425953
18.53	0.0266352	0.113751	0.0111665	0.0408351	0.00030845	0.0510747	0.0332182	0.000266218	0.00447038	0.0154531	0.0145188	0.00444804
18.56	0.0415922	0.115557	0.00814281	0.0378686	0.00153193	0.0595198	0.0290853	0.00217297	0.00281707	0.0233208	0.0151337	0.00309905
18.59	0.0597057	0.114932	0.00641946	0.0335039	0.00488066	0.0677604	0.0241734	0.00596854	0.00230486	0.0299081	0.0137479	0.00111517
18.62	0.0805033	0.111842	0.00625669	0.0279898	0.0106878	0.0753698	0.0187841	0.0114858	0.00526345	0.0334079	0.0107198	1.0412e-05
18.65	0.103302	0.106378	0.00787753	0.0217056	0.0191744	0.0818796	0.0133025	0.0182915	0.0123335	0.0327555	0.00704919	0.000887061
18.68	0.127234	0.0987585	0.0114571	0.015158	0.0304244	0.0868096	0.00818174	0.0257107	0.0214728	0.0280221	0.00405835	0.00356333
18.71	0.151288	0.0893279	0.0171129	0.0089718	0.0443628	0.0897062	0.00392122	0.0328885	0.0286548	0.0204867	0.0028878	0.00650928
18.74	0.174359	0.0785493	0.0248974	0.00387322	0.0607377	0.0901865	0.00103817	0.038886	0.0300841	0.0123366	0.00399653	0.00776206
18.77	0.195316	0.0669882	0.034792	0.000666623	0.0791075	0.0879857	3.5326e-05	0.0428021	0.0246953	0.00603923	0.00688916	0.00630975
18.8	0.213067	0.0552916	0.0467037	0.000205141	0.098835	0.0830019	0.00136614	0.0439112	0.0153685	0.0035272	0.0102273	0.00301237
18.83	0.226631	0.0441619	0.0604648	0.0033563	0.119093	0.0753352	0.00539995	0.0418002	0.00795526	0.0054527	0.0123367	0.000309569
18.86	0.235209	0.0343261	0.0758345	0.0109639	0.138884	0.065314	0.0123897	0.0364903	0.0084705	0.0108175	0.0119465	0.000711894
18.89	0.238241	0.0265023	0.0925043	0.0238077	0.157081	0.0535062	0.0224447	0.0285254	0.019896	0.0172264	0.00887391	0.00495076
18.92	0.23546	0.0213651	0.110105	0.0425627	0.172482	0.0407091	0.035511	0.0190153	0.0402974	0.0217939	0.00434572	0.0110706
18.95	0.226927	0.019511	0.128219	0.06776	0.1839	0.0279193	0.0513605	0.00962007	0.0632675	0.0224253	0.000767202	0.0153163
18.98	0.213042	0.0214258	0.146388	0.0997512	0.190253	0.016279	0.0695915	0.00247348	0.0805133	0.0189217	0.000954062	0.0145515
19.01	0.194545	0.0274564	0.164134	0.138678	0.190687	0.0070041	0.0896395	4.40786e-05	0.0853772	0.0133189	0.00707006	0.00878975
19.04	0.172489	0.0377871	0.180967	0.184447	0.184685	0.00129623	0.1108	0.00494318	0.0757051	0.00913253	0.0196584	0.0020302
19.07	0.148192	0.0524226	0.19641	0.236718	0.172178	0.000246542	0.132261	0.0196932	0.0548207	0.00969998	0.0371555	0.000376431
19.1	0.123175	0.0711797	0.21001	0.294895	0.153626	0.00473809	0.153143	0.046476	0.0301906	0.0163336	0.0561212	0.00809254
19.13	0.0990831	0.0936863	0.221355	0.358133	0.130067	0.015356	0.172548	0.0868843	0.0103018	0.0272422	0.0721599	0.0238608
19.16	0.0775893	0.119389	0.230091	0.425352	0.103105	0.0323138	0.189603	0.141701	0.00102681	0.0379372	0.0812485	0.039971
19.19	0.0603032	0.147573	0.235937	0.495264	0.0748499	0.0554041	0.20352	0.21073	0.00307371	0.0431668	0.0810216	0.0459394
19.22	0.0486718	0.17738	0.238693	0.566406	0.0477919	0.0839791	0.213631	0.292697	0.0118289	0.0396105	0.0715701	0.0355584
19.25	0.0438889	0.207851	0.238251	0.637183	0.0246192	0.116965	0.219435	0.385239	0.019937	0.0280442	0.0554719	0.0139153
19.28	0.0468162	0.237955	0.234604	0.705924	0.00799317	0.152913	0.220626	0.484985	0.0215823	0.0137749	0.0370426	1.11695e-05
19.31	0.0579205	0.266636	0.227842	0.770931	0.0002991	0.190078	0.217112	0.587729	0.0162778	0.00487299	0.0210589	0.0220974
19.34	0.0772331	0.292856	0.218159	0.830539	0.00339661	0.226531	0.209023	0.688679	0.00981678	0.00878713	0.0113768	0.106302
19.37	0.104332	0.315642	0.205842	0.883178	0.0183975	0.260284	0.196703	0.782779	0.011308	0.0287926	0.00988055	0.262908
19.4	0.138352	0.334128	0.191269	0.927425	0.045497	0.289431	0.180697	0.86506	0.0274663	0.0619358	0.016068	0.476734
19.43	0.178018	0.347593	0.174893	0.962059	0.0838822	0.31228	0.161716	0.931001	0.057324	0.0995483	0.0273534	0.707046
19.46	0.221706	0.355498	0.157233	0.986108	0.131732	0.327477	0.140602	0.976868	0.0908601	0.130261	0.0399441	0.898571
19.49	0.267521	0.357509	0.138854	0.998881	0.186315	0.334106	0.118284	1	0.11316	0.144302	0.0499872	1
19.52	0.313401	0.353519	0.120351	1	0.244184	0.331754	0.0957298	0.999019	0.112439	0.137248	0.0546394	0.982628
19.55	0.357217	0.343649	0.102329	0.989412	0.301448	0.320545	0.073896	0.973936	0.0875618	0.111655	0.0527692	0.851197
19.58	0.396895	0.328252	0.0853803	0.967394	0.354095	0.301128	0.053684	0.926161	0.050373	0.0759296	0.0451344	0.642194
19.61	0.430525	0.307899	0.0700709	0.934539	0.398343	0.27463	0.0358993	0.858391	0.0208067	0.0409979	0.0340322	0.410321
19.64	0.456467	0.283356	0.0569155	0.891743	0.430974	0.242576	0.021217	0.774409	0.0168878	0.0162561	0.0225493	0.20894
19.67	0.473441	0.255551	0.0463628	0.840163	0.44962	0.206781	0.0101582	0.678802	0.0449659	0.00643813	0.0136303	0.0727253
19.7	0.480596	0.225541	0.0387793	0.781182	0.452972	0.169222	0.00307406	0.576613	0.0956973	0.0105446	0.00921681	0.0092993
19.73	0.477559	0.194464	0.0344371	0.716356	0.440887	0.131906	0.000140432	0.472979	0.148189	0.0230186	0.00969124	0.00223247
19.76	0.464452	0.163492	0.033504	0.647357	0.414391	0.0967412	0.00136107	0.372767	0.180136	0.0364481	0.0137892	0.0226534
19.79	0.441887	0.133782	0.0360379	0.575914	0.375566	0.0654216	0.00657884	0.280247	0.178463	0.0445805	0.0190323	0.0433118
19.82	0.410928	0.10643	0.0419842	0.503756	0.327344	0.039332	0.0154932	0.19883	0.144885	0.0444878	0.022587	0.0487315
19.85	0.373032	0.0824212	0.0511779	0.432548	0.273228	0.0194817	0.0276822	0.130887	0.0938461	0.0372042	0.0223157	0.0378437
19.88	0.329967	0.0625923	0.0633487	0.36384	0.216975	0.00646844	0.0426272	0.0776579	0.0445637	0.0268067	0.0176856	0.0195403
19.91	0.283715	0.0475976	0.0781301	0.299016	0.162263	0.000473295	0.0597386	0.0392661	0.0118489	0.0184506	0.0102034	0.00480697
19.94	0.236362	0.0378832	0.0950716	0.239255	0.112396	0.0012834	0.0783811	0.0148164	0.000434144	0.016161	0.00315286	1.1946e-05
19.97	0.189986	0.033671	0.113654	0.185498	0.0700511	0.00833892	0.0978973	0.00257205	0.00506828	0.0211824	0.000632251	0.00442959
20	0.146546	0.0349532	0.133306	0.138429	0.0371103	0.0207973	0.117629	0.000187344	0.0153278	0.0314531	0.00614401	0.0122902
20.03	0.107784	0.041496	0.153424	0.0984652	0.0145749	0.0376084	0.136934	0.00497061	0.0218962	0.0423953	0.0211906	0.0172216
20.06	0.0751363	0.0528542	0.173392	0.0657571	0.00257009	0.0575929	0.155205	0.014152	0.0209585	0.0487694	0.0443905	0.0160941
20.09	0.0496692	0.0683943	0.192602	0.0402019	0.000428162	0.0795182	0.17188	0.0251307	0.0149562	0.0469401	0.0714983	0.010202
20.12	0.0320334	0.0873253	0.21047	0.0214645	0.00683455	0.102167	0.186456	0.0356811	0.0100569	0.0366827	0.0964211	0.0036096
20.15	0.0224462	0.108737	0.226462	0.00900777	0.0200146	0.124395	0.198496	0.0441004	0.0121358	0.0217249	0.112966	0.000153457
20.18	0.020698	0.131639	0.240103	0.00212876	0.037937	0.145173	0.20764	0.0492903	0.0233737	0.00863876	0.116761	0.00111435
20.21	0.0261828	0.155009	0.250996	3.41121e-07	0.0585116	0.16362	0.213614	0.0507706	0.0409378	0.00435709	0.106697	0.00484236
20.24	0.0379503	0.177835	0.258832	0.00171487	0.0797614	0.179023	0.216236	0.0486298	0.0581591	0.0132307	0.0853654	0.00824432
20.27	0.0547757	0.199157	0.263398	0.00632866	0.0999569	0.190844	0.215422	0.0434233	0.0675909	0.0348693	0.0583142	0.00893497
20.3	0.0752423	0.21811	0.264584	0.0129048	0.117705	0.198721	0.211195	0.036037	0.0645948	0.0637921	0.0323642	0.00662841
20.33	0.0978312	0.233953	0.262379	0.0205529	0.131991	0.202466	0.203684	0.027532	0.0498265	0.0911936	0.0135485	0.00301696
20.36	0.121013	0.246098	0.256875	0.0284632	0.142184	0.202058	0.193126	0.01899	0.0293504	0.108194	0.00537914	0.000422721
20.39	0.143335	0.254134	0.248259	0.0359351	0.148008	0.197631	0.179863	0.0113764	0.0121082	0.10924	0.00800517	0.000231107
20.42	0.1635	0.257827	0.236801	0.042398	0.14949	0.189467	0.164335	0.00543334	0.00577746	0.0941959	0.018493	0.00212084
20.45	0.18043	0.257133	0.222849	0.0474243	0.146905	0.177976	0.147065	0.00161264	0.0130274	0.0682358	0.0320557	0.00447794
20.48	0.193316	0.252184	0.206809	0.050735	0.140711	0.163687	0.128638	5.11361e-05	0.0301545	0.0396298	0.0437371	0.00558735
20.51	0.201643	0.243277	0.189135	0.0521967	0.131497	0.147223	0.109688	0.000587499	0.0489127	0.016447	0.0499416	0.00475095
20.54	0.205205	0.230853	0.170309	0.0518126	0.119929	0.129277	0.0908583	0.00281405	0.0606141	0.00363948	0.0493143	0.00262496
20.57	0.204089	0.215468	0.150824	0.0497068	0.106713	0.110583	0.0727827	0.00615381	0.0602876	0.0016992	0.0427634	0.000645939
20.6	0.198648	0.197763	0.131172	0.046104	0.0925612	0.0918791	0.0560492	0.00995105	0.0486837	0.00727719	0.032745	1.27398e-05
20.63	0.189462	0.178431	0.111822	0.0413056	0.0781557	0.0738726	0.0411726	0.0135629	0.0312129	0.0152378	0.0221771	0.000927942
20.66	0.177279	0.158185	0.093211	0.035664	0.0641239	0.0571999	0.0285673	0.0164407	0.014699	0.0210462	0.013423	0.00256376
20.69	0.162956	0.137721	0.0757264	0.0295563	0.0510086	0.0423907	0.0185263	0.0181917	0.00396454	0.0224006	0.00768365	0.00370323
20.72	0.147396	0.117689	0.0596995	0.0233587	0.0392418	0.0298374	0.0112065	0.0186153	9.95041e-05	0.0195447	0.00492536	0.00357474
20.75	0.131481	0.0986684	0.0453956	0.0174238	0.029123	0.0197734	0.00662182	0.0177117	0.00100905	0.0144123	0.00424813	0.00231783
20.78	0.116024	0.0811456	0.0330093	0.0120609	0.0208054	0.0122631	0.00464561	0.0156633	0.00342255	0.00926682	0.00445471	0.000809346
20.81	0.101713	0.0654976	0.0226622	0.00751995	0.0142936	0.00720537	0.005022	0.0127948	0.00488372	0.00559628	0.00456175	2.06011e-05
20.84	0.0890787	0.0519835	0.0144034	0.00398125	0.00945617	0.00435035	0.00738529	0.00951765	0.004627	0.00371493	0.00408016	0.000367676
20.87	0.0784749	0.0407422	0.00821248	0.00154948	0.00605313	0.00332937	0.0112864	0.00626786	0.00321919	0.00306048	0.00302739	0.0014822
20.9	0.0700664	0.0317956	0.00400522	0.000252995	0.003777	0.00369472	0.0162248	0.0034457	0.00163378	0.00282187	0.00175051	0.00251871
20.93	0.0638366	0.0250582	0.00164119	4.76843e-05	0.00230279	0.00496559	0.0216823	0.00136472	0.000539563	0.00246343	0.000690828	0.00275273
20.96	0.0596057	0.0203512	0.000933161	0.000825025	0.00134021	0.00667551	0.0271582	0.000216148	0.000130362	0.00189507	0.000200899	0.00205197
20.99	0.0570591	0.0174212	0.00165779	0.00242347	0.000679913	0.00841602	0.0322006	5.22431e-05	0.000300035	0.00131443	0.000462226	0.000918999
21.02	0.0557838	0.0159608	0.00356712	0.00464231	0.000225907	0.00987189	0.036434	0.000789311	0.000809735	0.000931118	0.00148759	0.000109594
21.05	0.0553097	0.0156311	0.00640029	0.00725697	7.4467e-06	0.010844	0.0395789	0.00222865	0.00132047	0.00078948	0.00315947	0.00011096
21.08	0.0551521	0.0160845	0.00989525	0.0100348	0.000167061	0.0112571	0.041464	0.00409138	0.00144462	0.000774728	0.00526309	0.000836025
21.11	0.0548525	0.0169862	0.0137996	0.0127503	0.000924989	0.0111524	0.0420283	0.00606166	0.00098102	0.000737658	0.00750366	0.00172153
21.14	0.0540154	0.0180338	0.0178808	0.0151989	0.00252466	0.0106657	0.0413152	0.00783188	0.000235411	0.000609288	0.00952599	0.00213662
21.17	0.0523372	0.0189732	0.0219343	0.0172085	0.00516761	0.00999355	0.039458	0.00914383	9.18088e-05	0.000421427	0.0109613	0.00180883
21.2	0.0496276	0.0196116	0.0257908	0.0186485	0.008949	0.00935411	0.0366598	0.00982051	0.00158974	0.000244793	0.0115074	0.000982637
21.23	0.0458207	0.0198254	0.0293209	0.0194352	0.0138057	0.00894559	0.0331679	0.00978491	0.00516376	0.000119632	0.0110192	0.000222313
21.26	0.0409761	0.0195639	0.0324383	0.0195346	0.0194882	0.00890992	0.0292479	0.00906418	0.0100766	4.19546e-05	0.00957016	1.35494e-05
21.29	0.0352707	0.0188483	0.0351006	0.0189609	0.0255633	0.00930614	0.0251579	0.00777937	0.0145569	4.65759e-06	0.00744798	0.000442699
21.32	0.0289823	0.0177667	0.0373085	0.0177731	0.031453	0.0100977	0.0211266	0.0061231	0.0166829	3.89433e-05	0.00507832	0.00116319
21.35	0.0224663	0.0164654	0.0391027	0.0160682	0.0365039	0.0111562	0.017336	0.00432879	0.0154839	0.000204275	0.00290266	0.00165412
21.38	0.0161274	0.0151367	0.0405594	0.0139727	0.0400818	0.0122809	0.0139126	0.00263622	0.0115168	0.000528529	0.00125786	0.00158041
21.41	0.0103893	0.0140052	0.0417847	0.0116326	0.0416772	0.0132334	0.010925	0.00125811	0.00652459	0.000953424	0.000301183	0.0010072
21.44	0.00566392	0.0133121	0.0429075	0.00920263	0.0410056	0.0137813	0.00838967	0.000352399	0.00242427	0.00134341	6.04207e-07	0.000333179
21.47	0.00232301	0.0132995	0.044072	0.00683564	0.0380863	0.0137471	0.0062838	3.47846e-06	0.000318414	0.00156313	0.000179893	3.4955e-06
21.5	0.000673167	0.0141949	0.0454294	0.00467268	0.033285	0.0130538	0.0045628	0.000214555	0.000138006	0.00156501	0.000589901	0.000207428
21.53	0.000936683	0.0161974	0.0471305	0.00283426	0.0273094	0.0117621	0.00318128	0.000911551	0.00101246	0.00141306	0.000978866	0.000764678
21.56	0.00323867	0.0194655	0.0493175	0.0014135	0.021155	0.0100921	0.00211421	0.0019574	0.00196488	0.00122391	0.00115002	0.00126661
21.59	0.0076012	0.024108	0.0521172	0.000471378	0.0160033	0.00842494	0.00137617	0.00317425	0.00242991	0.0010879	0.00100939	0.00136382
21.62	0.0139444	0.0301772	0.0556349	3.43e-05	0.0130846	0.00728385	0.00103578	0.00437012	0.00239575	0.0010682	0.000606773	0.000998826
21.65	0.022094	0.0376661	0.0599498	9.40864e-05	0.0135212	0.00729318	0.00122368	0.0053662	0.00233348	0.00131494	0.000157809	0.000429988
21.68	0.0317945	0.0465083	0.0651104	0.000610191	0.0181719	0.00911972	0.00213236	0.0060209	0.0031357	0.00220576	1.7281e-05	4.11214e-05
21.71	0.0427265	0.056581	0.0711335	0.00151394	0.0274996	0.0134015	0.00400738	0.00624766	0.00602206	0.0043334	0.000574691	7.59153e-05
21.74	0.0545268	0.0677109	0.078002	0.00271443	0.041481	0.0206715	0.00713031	0.00602426	0.0121252	0.00820689	0.00207421	0.000479969
21.77	0.0668104	0.0796825	0.0856667	0.00410556	0.059572	0.031285	0.0117945	0.00539282	0.0216187	0.0137303	0.00441546	0.000951856
21.8	0.0791918	0.0922477	0.0940472	0.00557383	0.0807369	0.0453582	0.0182755	0.00445087	0.0327848	0.0197647	0.00704026	0.00115873
21.83	0.0913049	0.105137	0.103036	0.00700614	0.103538	0.062727	0.0267992	0.00333522	0.0418736	0.0241824	0.00901673	0.000963095
21.86	0.10282	0.118072	0.1125	0.00829737	0.126276	0.0829308	0.0375102	0.00220112	0.0444332	0.0246547	0.00937199	0.000506904
21.89	0.113459	0.130775	0.12229	0.00935693	0.147166	0.105224	0.0504435	0.00119974	0.0378585	0.0199991	0.00760868	0.000102751
21.92	0.123003	0.142982	0.132241	0.0101142	0.164522	0.128617	0.0655028	0.000457304	0.0237944	0.0114598	0.00421357	1.43729e-05
21.95	0.131301	0.15445	0.142183	0.0105224	0.176935	0.151943	0.0824479	5.85553e-05	0.00861549	0.003103	0.000897042	0.000279991
21.98	0.138267	0.164968	0.151939	0.0105605	0.183413	0.173941	0.100892	3.67239e-05	0.00104923	0.000777573	0.000344412	0.000696167
22.01	0.143884	0.174361	0.161342	0.0102337	0.183474	0.193357	0.120313	0.000371064	0.00775123	0.00976595	0.00542583	0.000966167
22.04	0.148195	0.182497	0.17023	0.00957199	0.177184	0.209045	0.14007	0.000992016	0.0291898	0.0320277	0.01805	0.000905275
22.07	0.151297	0.189285	0.178454	0.00862689	0.165125	0.220055	0.15944	0.00179295	0.0584031	0.0643713	0.0380615	0.000561507
22.1	0.153329	0.19468	0.185887	0.00746732	0.148318	0.225715	0.177653	0.00264657	0.0837394	0.0986728	0.0626627	0.000173405
22.13	0.15447	0.19868	0.192417	0.0061741	0.128103	0.225683	0.193941	0.00342358	0.094378	0.124409	0.0867286	2.31675e-07
22.16	0.154922	0.20132	0.197961	0.00483417	0.105999	0.219972	0.207582	0.0040108	0.0857032	0.132652	0.104083	0.000144958
22.19	0.154904	0.202674	0.202456	0.00353437	0.0835577	0.208947	0.217945	0.00432644	0.0615807	0.119854	0.109427	0.000490455
22.22	0.154644	0.202844	0.205867	0.00235568	0.0622408	0.193289	0.224538	0.00433024	0.0323068	0.0896979	0.100291	0.000787742
22.25	0.15437	0.201957	0.208183	0.00136796	0.0433245	0.173941	0.227031	0.00402757	0.0094095	0.0520394	0.0782948	0.000830414
22.28	0.154307	0.200161	0.209415	0.000625613	0.0278422	0.152026	0.225286	0.00346689	0.000136607	0.0192871	0.0491572	0.00059342
22.31	0.15467	0.197614	0.209598	0.000164553	0.0165688	0.128769	0.219364	0.00273135	0.00446758	0.00170039	0.0213155	0.000243262
22.34	0.155658	0.194484	0.208786	4.16807e-07	0.0100371	0.105401	0.209522	0.00192579	0.015974	0.0035986	0.00352007	1.75093e-05
22.37	0.157456	0.190941	0.20705	0.000128261	0.00857685	0.083083	0.196199	0.00116127	0.0257867	0.0220417	0.00215997	6.04311e-05
22.4	0.160225	0.187153	0.204473	0.000523626	0.0123621	0.0628404	0.179986	0.000539173	0.0274417	0.0484252	0.0192165	0.000328136
22.43	0.164102	0.183283	0.201153	0.00114489	0.0214522	0.0455116	0.161596	0.000137353	0.0201192	0.0721632	0.0515514	0.000625239
22.46	0.169197	0.179487	0.19719	0.00193667	0.0358142	0.0317234	0.141814	1.56506e-29	0.00872197	0.0848032	0.0917822	0.000743366
22.49	0.175587	0.175909	0.192694	0.00283406	0.0553215	0.0218852	0.121457	0.000132603	0.000814049	0.0828718	0.13045	0.000603614
22.52	0.183311	0.172682	0.187775	0.00376733	0.0797258	0.0162015	0.10133	0.000502517	0.00198272	0.0684456	0.15875	0.000305828
22.55	0.19237	0.169925	0.182542	0.00466685	0.108609	0.0146995	0.0821798	0.00104486	0.0120752	0.0474885	0.170916	5.43733e-05
22.58	0.202719	0.167741	0.177103	0.00546772	0.141329	0.0172636	0.0646642	0.00167273	0.0246012	0.0269172	0.165536	1.52085e-05
22.61	0.214268	0.16622	0.171559	0.0061141	0.176967	0.0236724	0.0493242	0.00229019	0.0302568	0.0117626	0.145447	0.000203971
22.64	0.226874	0.165434	0.166009	0.00656263	0.214299	0.0336323	0.0365675	0.00280603	0.0233761	0.00360269	0.116399	0.000480303
22.67	0.240347	0.165437	0.160543	0.00678499	0.251803	0.0468026	0.0266613	0.00314654	0.00807943	0.000804572	0.0850386	0.000648761
22.7	0.254448	0.166266	0.155244	0.0067693	0.28771	0.0628098	0.0197362	0.00326523	0.000183596	0.000335525	0.0569688	0.000593999
22.73	0.268896	0.167936	0.150186	0.00652045	0.320096	0.0812502	0.0157968	0.00314858	0.0224117	0.000286426	0.0354935	0.00035693
22.76	0.28337	0.170445	0.145437	0.00605917	0.347023	0.101684	0.01474	0.00281685	0.0938235	0.00197908	0.0213768	0.000101806
22.79	0.297524	0.173766	0.141054	0.00542016	0.366698	0.12362	0.016377	0.0023202	0.218062	0.0106629	0.0135329	1.57009e-07
22.82	0.310992	0.177852	0.137089	0.0046493	0.377648	0.146503	0.0204568	0.00173062	0.37675	0.0342917	0.0102619	0.000113391
22.85	0.323406	0.182632	0.133583	0.00380014	0.378884	0.169699	0.0266895	0.00113113	0.53268	0.0805731	0.0105013	0.000354242
22.88	0.334406	0.188013	0.130568	0.00293005	0.370022	0.192493	0.0347663	0.000603728	0.642691	0.153203	0.0146163	0.000550939
22.91	0.34366	0.193878	0.128071	0.00209621	0.35136	0.214096	0.0443758	0.00021782	0.67482	0.248692	0.0244637	0.000567154
22.94	0.350872	0.200091	0.126106	0.00135167	0.323888	0.233667	0.0552143	2.07906e-05	0.621472	0.355206	0.0427309	0.000394123
22.97	0.355801	0.206497	0.124681	0.000741897	0.289227	0.250351	0.0669912	3.19663e-05	0.502004	0.45433	0.0717885	0.000152852
23	0.35827	0.212925	0.123794	0.000301877	0.249504	0.263328	0.0794289	0.000240699	0.353495	0.525592	0.112441	7.56508e-06
23.03	0.358174	0.219193	0.123436	5.40364e-05	0.207175	0.27187	0.092259	0.000608738	0.214652	0.552476	0.16298	5.21348e-05
23.06	0.355487	0.225112	0.123584	7.06302e-06	0.164815	0.275398	0.105216	0.00107643	0.111171	0.527822	0.218859	0.000247895
23.09	0.350263	0.230489	0.12421	0.000155707	0.1249	0.273546	0.118029	0.00157177	0.0495024	0.456518	0.273139	0.000453871
23.12	0.342632	0.23514	0.125273	0.000481525	0.089604	0.266199	0.130416	0.0020209	0.0208349	0.354265	0.317678	0.00052612
23.15	0.332797	0.238887	0.126725	0.000954507	0.060632	0.253527	0.142083	0.00235867	0.0113819	0.242719	0.344797	0.000416315
23.18	0.321025	0.241571	0.128506	0.00153544	0.0391121	0.23599	0.152719	0.00253753	0.0121075	0.142759	0.349064	0.000202172
23.21	0.307629	0.243052	0.130548	0.00217885	0.0255471	0.214327	0.162003	0.00253387	0.0223799	0.0684587	0.328712	3.07891e-05
23.24	0.292959	0.243222	0.132777	0.00283624	0.0198321	0.189512	0.169619	0.00235063	0.0464627	0.0240022	0.286299	1.60543e-05
23.27	0.277385	0.242002	0.13511	0.00345953	0.0213291	0.162697	0.175262	0.00201622	0.0863022	0.00450852	0.228349	0.000161558
23.3	0.261277	0.239347	0.137458	0.00400432	0.0289851	0.135137	0.178662	0.00157979	0.135989	3.99619e-05	0.164008	0.000361073
23.33	0.244991	0.235252	0.139731	0.00443279	0.0414751	0.108102	0.179598	0.00110372	0.181705	0.000763822	0.102995	0.000474215
23.36	0.228857	0.229749	0.141835	0.00471617	0.0573503	0.0827918	0.177926	0.000654467	0.207247	0.000925985	0.0534118	0.000423497
23.39	0.213162	0.222906	0.143676	0.00483644	0.0751734	0.0602564	0.173585	0.000292986	0.201814	6.84765e-05	0.0199945	0.000245778
23.42	0.198142	0.214827	0.145166	0.00478728	0.0936262	0.0413265	0.16662	6.62711e-05	0.165608	0.0013676	0.00332575	6.40695e-05
23.45	0.183977	0.205647	0.146217	0.00457424	0.111581	0.0265668	0.157185	1.03216e-06	0.110247	0.0083449	0.000218484	1.03722e-06
23.48	0.170788	0.195529	0.146754	0.00421402	0.128135	0.0162519	0.145543	0.00010042	0.0539587	0.0218505	0.00511604	9.49426e-05
23.51	0.158636	0.184655	0.146707	0.00373307	0.142608	0.0103658	0.132061	0.000344166	0.0140858	0.0388784	0.012029	0.000275529
23.54	0.147528	0.173221	0.146021	0.00316553	0.154514	0.00862623	0.117194	0.000692041	0.000429091	0.0536952	0.0163631	0.000414878
23.57	0.137423	0.161433	0.144654	0.00255071	0.163526	0.0105279	0.101465	0.00109005	0.012196	0.0605472	0.0160568	0.000416528
23.6	0.128239	0.149492	0.142578	0.00193022	0.169425	0.0154014	0.085437	0.00147841	0.0394249	0.05647	0.0117132	0.00028085
23.63	0.119867	0.137596	0.139783	0.00134514	0.172073	0.0224799	0.0696811	0.00180022	0.0678365	0.042781	0.00578763	0.000102445
23.66	0.112181	0.125929	0.136275	0.000833151	0.171394	0.0309671	0.0547474	0.00200942	0.0848294	0.0245872	0.00122262	3.00374e-06
23.69	0.105047	0.114654	0.132076	0.000426051	0.167373	0.0401001	0.0411323	0.00207707	0.0841397	0.00863457	9.60864e-05	4.71909e-05
23.72	0.0983345	0.103912	0.127225	0.000147711	0.160073	0.0492006	0.0292515	0.0019951	0.0674393	0.000571074	0.00279468	0.000199629
23.75	0.0919263	0.0938156	0.121776	1.26221e-05	0.149667	0.0577122	0.0194184	0.00177692	0.0425049	0.00284586	0.00797905	0.00035151
23.78	0.0857239	0.0844487	0.115799	2.51106e-05	0.136464	0.0652205	0.0118285	0.00145506	0.0190462	0.0140525	0.0132769	0.000396954
23.81	0.0796525	0.0758651	0.109372	0.000179278	0.120931	0.0714555	0.0065532	0.00107605	0.00423879	0.0298042	0.0163578	0.000305601
23.84	0.0736639	0.0680895	0.102586	0.000459636	0.103699	0.0762811	0.00354135	0.000693547	3.00789e-05	0.0445899	0.0159209	0.000141718
23.87	0.0677361	0.0611188	0.0955367	0.000842385	0.0855419	0.0796713	0.00262928	0.000360531	0.00330707	0.0537649	0.0121989	1.79502e-05
23.9	0.0618714	0.0549257	0.0883245	0.00129724	0.067335	0.0816811	0.00355791	0.000121776	0.00850069	0.0549366	0.00680988	1.69083e-05
23.93	0.056093	0.0494623	0.0810513	0.00178964	0.0499913	0.0824147	0.00599545	7.68165e-06	0.0109656	0.0483806	0.00206005	0.000135127
23.96	0.0504401	0.0446645	0.0738168	0.00228323	0.0343815	0.081996	0.00956382	3.02676e-05	0.0092147	0.0365401	1.48726e-05	0.000287342
23.99	0.0449623	0.0404571	0.0667164	0.0027424	0.0212518	0.080546	0.0138665	0.000181863	0.00494326	0.0229525	0.00171751	0.000366831
24.02	0.0397139	0.0367587	0.0598382	0.00313472	0.0111474	0.0781678	0.0185156	0.000436627	0.00118938	0.0110441	0.006844	0.000319161
24.05	0.0347483	0.0334861	0.053261	0.00343306	0.00435614	0.074942	0.0231562	0.00075461	5.10291e-05	0.00316644	0.0138869	0.000178447
24.08	0.0301131	0.0305594	0.0470522	0.00361741	0.000878591	0.0709303	0.0274857	0.00108774	0.00145806	0.000103086	0.0207482	4.20205e-05
24.11	0.0258468	0.027905	0.0412664	0.00367605	0.00043141	0.066186	0.0312683	0.00138683	0.00361499	0.00110988	0.0254811	2.23296e-06
24.14	0.0219755	0.0254591	0.0359449	0.0036062	0.0024838	0.0607692	0.0343418	0.00160861	0.00455163	0.00440613	0.0268979	8.31192e-05
24.17	0.0185121	0.0231695	0.0311145	0.00341402	0.00632282	0.054762	0.0366189	0.00172172	0.00355774	0.00791917	0.0248499	0.000225312
24.2	0.0154563	0.0209969	0.0267884	0.00311403	0.011139	0.0482815	0.038082	0.00171098	0.00152555	0.0100198	0.0201322	0.000328564
24.23	0.0127955	0.0189151	0.0229661	0.00272789	0.0161208	0.0414871	0.0387728	0.00157917	0.00010958	0.00999845	0.0141095	0.000321468
24.26	0.0105067	0.0169105	0.019635	0.0022828	0.0205457	0.0345806	0.0387788	0.0013463	0.000447792	0.00813263	0.00823705	0.000209943
24.29	0.00855929	0.0149805	0.0167713	0.00180948	0.023855	0.0277989	0.038217	0.00104639	0.00239655	0.00536283	0.00365328	7.15918e-05
24.32	0.00691808	0.0131321	0.0143421	0.00134004	0.0257048	0.021398	0.0372179	0.000722359	0.00474406	0.00275664	0.0009539	9.24801e-07
24.35	0.00554585	0.0113789	0.0123073	0.000905657	0.0259856	0.0156329	0.0359103	0.000419718	0.00611949	0.00102297	0.000171252	4.4056e-05
24.38	0.00440615	0.00973916	0.0106216	0.000534537	0.0248107	0.0107331	0.0344091	0.000180063	0.00587393	0.000291371	0.000907502	0.000167964
24.41	0.00346534	0.00823273	0.00923668	0.00024996	0.0224771	0.00687905	0.0328055	3.5212e-05	0.00434442	0.00021975	0.00253777	0.00028475
24.44	0.00269408	0.00687886	0.00810339	6.88052e-05	0.0194048	0.00418195	0.0311631	2.86595e-06	0.00244124	0.000318144	0.00440624	0.000313146
24.47	0.00206799	0.00569394	0.00717362	5.0006e-07	0.0160658	0.00266953	0.0295159	8.43635e-05	0.000975591	0.000274887	0.00596963	0.000234258
24.5	0.00156776	0.0046897	0.00640212	4.65166e-05	0.0129129	0.00228055	0.0278722	0.000264803	0.00023595	9.84284e-05	0.00687638	0.000103363
24.53	0.00117852	0.00387201	0.00574798	0.00020042	0.010318	0.00286859	0.0262198	0.000515476	2.9019e-05	2.01678e-05	0.00699036	1.04717e-05
24.56	0.000888843	0.00324017	0.00517582	0.000448463	0.00852927	0.00421527	0.0245347	0.000798219	1.63875e-05	0.000256112	0.00637341	1.77685e-05
24.59	0.000689439	0.00278676	0.0046566	0.000770669	0.00764943	0.0060514	0.0227892	0.00107103	8.41623e-06	0.000803997	0.00523727	0.000117363
24.62	0.000571794	0.00249803	0.00416809	0.00114233	0.00763878	0.00808374	0.0209612	0.00129412	8.26242e-06	0.00141363	0.00387288	0.000238031
24.65	0.000526956	0.00235479	0.00369495	0.00153578	0.00833817	0.0100243	0.019041	0.00143554	6.35697e-05	0.00174335	0.00256872	0.000295384
24.68	0.000544636	0.00233358	0.00322849	0.0019224	0.00950736	0.0116188	0.0170365	0.00147562	0.000136559	0.00158951	0.00153645	0.000250166
24.71	0.00061274	0.00240816	0.00276614	0.00227455	0.010871	0.0126712	0.0149755	0.00140951	0.000135796	0.00103022	0.000865437	0.000134435
24.74	0.000717409	0.00255113	0.0023106	0.00256752	0.0121644	0.013061	0.0129046	0.00124759	6.15997e-05	0.000385745	0.00052137	2.82056e-05
24.77	0.000843569	0.00273551	0.00186887	0.00278112	0.0131717	0.0127522	0.0108863	0.00101379	9.35442e-05	2.19076e-05	0.00038795	3.52772e-06
24.8	0.000975918	0.00293626	0.00145106	0.00290105	0.0137516	0.0117925	0.00899254	0.000741853	0.000501335	0.000125367	0.000332516	7.50477e-05
24.83	0.00110025	0.00313151	0.0010692	0.00291974	0.0138475	0.0103033	0.00729765	0.00047038	0.00142921	0.000595661	0.000265558	0.000190953
24.86	0.00120493	0.00330352	0.000736002	0.00283678	0.0134826	0.00846211	0.00586987	0.000237249	0.00272865	0.00111926	0.000167842	0.000269808
24.89	0.00128234	0.00343935	0.000463718	0.0026588	0.0127426	0.00647927	0.00476365	7.42116e-05	0.00398428	0.00137183	7.60723e-05	0.00025712
24.92	0.00133013	0.00353105	0.000263086	0.00239891	0.0117497	0.00457231	0.00401289	2.47524e-06	0.00472516	0.00121484	3.99754e-05	0.000162382
24.95	0.00135202	0.00357553	0.000142465	0.00207567	0.0106353	0.00294068	0.0036263	2.98584e-05	0.00467387	0.000762666	7.84476e-05	5.14223e-05
24.98	0.00135811	0.00357413	0.000107164	0.0017117	0.00951453	0.00174401	0.00358523	0.000149907	0.00387217	0.000285747	0.000161649	1.20865e-07
